# Supplementary material for: Detecting and tracking honeybees in 3D at the beehive entrance using stereo vision
Source: Springer Nature journal article supplement (doi:10.1186/1687-5281-2013-59), 2013-11-05

# Tracker complexities

Time per  
frame (sec)

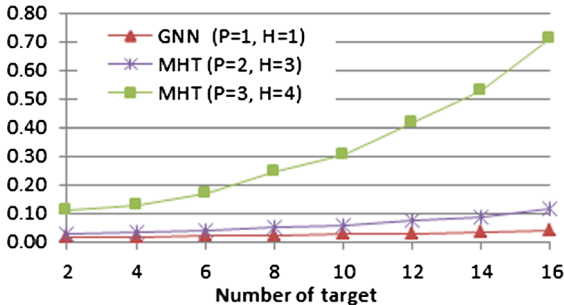

Supplement: 13640_2013_374_MOESM15_ESM.pdf [file 13640_2013_374_MOESM15_ESM.pdf]
