# Supplementary material for: Detecting and tracking honeybees in 3D at the beehive entrance using stereo vision
Source: Springer Nature journal article supplement (doi:10.1186/1687-5281-2013-59), 2013-11-05

# 2D,3D - GNN,MHT performance

Recovered

90 %

80 %

70 %

60 %

2

4

6

8

10

12

14

16

18

Number of target

▲ 3D-GNN (P=1, H=1)  
● 3D-MHT (P=2, H=3)  
■ 3D-MHT (P=3, H=4)

▲ 2D-GNN (P=1, H=1)  
○ 2D-MHT (P=2, H=3)  
□ 2D-MHT (P=3, H=4)

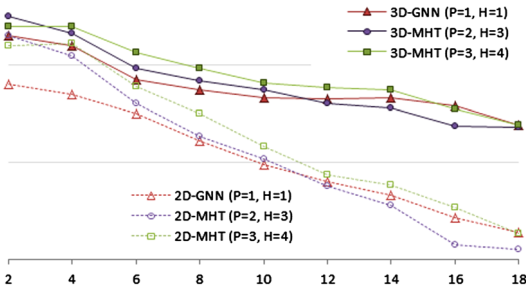

Supplement: 13640_2013_374_MOESM16_ESM.pdf [file 13640_2013_374_MOESM16_ESM.pdf]
